# Supplementary material for: Histone H3 N-terminal acetylation sites especially K14 are important for rDNA silencing and aging
Source: PubMed Central journal article supplement (PMC4764821; doi:10.1038/srep21900), 2016-02-24

## **Supplementary information**

### **Histone H3 N-terminal acetylation sites especially K14 are important for rDNA silencing and aging**

Heng-hao Xu<sup>1,2</sup>, Trent Su<sup>3</sup>, Yong Xue<sup>1,3,\*</sup>,

<sup>1</sup> Jiangsu Key Laboratory of Marine Pharmaceutical Compound Screening, Huaihai Institute of Technology, Lianyungang 222005, China.

<sup>2</sup> Co-Innovation Center of Jiangsu Marine Bio-industry Technology, Lianyungang, 222005, China.

<sup>3</sup> Department of Biological Chemistry, David Geffen School of Medicine, University of California, Los Angeles, CA 90095, USA

**Supplementary Table S1.** Lists of yeast strains and plasmids.  
*Available as separate MS Excel file*

**Supplementary Figure S1** Histone H3 N terminal acetylation site glutamine mutations, especially K14, affect rDNA silencing. The image is the color assay result showing the phenotypes of wide-type (WT) and H3 mutants on rDNA silencing. The reporter gene *MET15* was integrated in the rDNA locus to show the silenced status (brown) and depressed status (white).

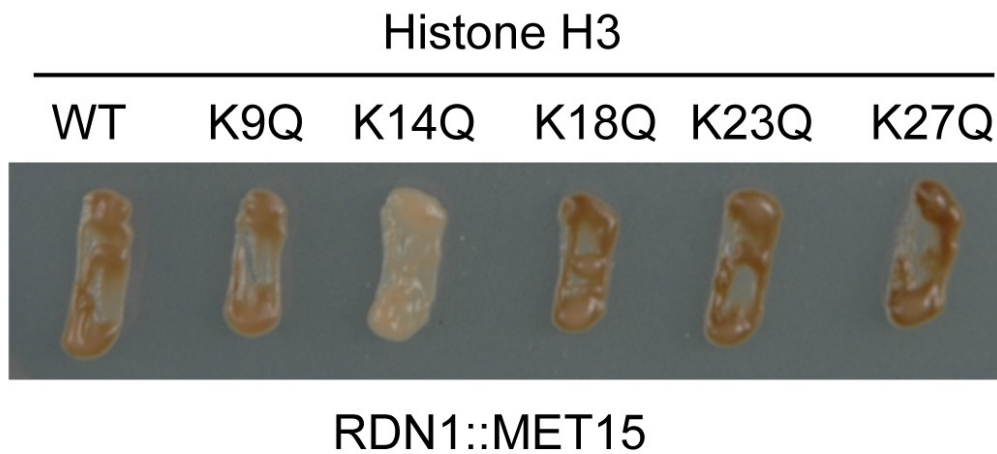

**Supplementary Figure S2** Fob1 recruitment at rDNA region is not affected in H3 mutants. The DNA from Fob1 IP in H3 mutants were normalized to Input and SPS2.

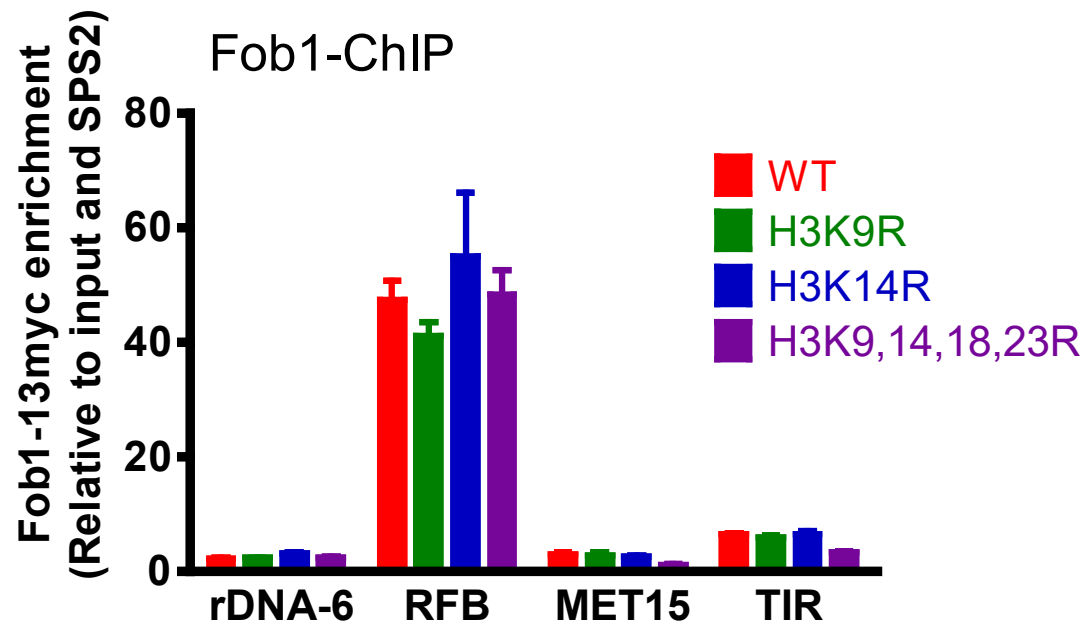

Supplement: srep21900-s1.pdf [file srep21900-s1.pdf]
